# Supplementary material
Source: publisher site journal article supplement (https://www.degruyterbrill.com/publication/journal_key/JCCALL/downloadAsset/JCCALL_2025%20JCCALL%20special%20issue%20CFP_AI%20literacy.pdf)
Supplement: Supplementary file 1 [file JCCALL_2025%20JCCALL%20special%20issue%20CFP_AI%20literacy.pdf]

## **Call for Papers (Special): Journal of China Computer-Assisted Language Learning (JCCALL)**

**Special Issue Theme: Cultivating AI literacy in language education:  
Theoretical discussions and practical applications**

---

### **Guest editor(s):**

Dr. Junjie Gavin Wu, Faculty of Applied Sciences, Macao Polytechnic University

Dr. Seongyong Lee, School of Education and English, University of Nottingham Ningbo China

Dr. Danyang Zhang, College of International Studies, Shenzhen University

Dr. Csaba Z Szabo, Institute for Language Education, University of Edinburgh

---

**To be published in Volume 2, 2025**

---

### **Background**

In the past decade, language education has been greatly empowered by the advance of technology. Over time, literacy has transcended traditional paper literacy, moved towards mobile literacy, and is now progressing into the realms of emerging artificial intelligence (AI) and extended reality (XR) literacies. The evolution of literacy underscores the dynamic nature of learning and adapting to new forms of communication and information consumption (Jeon et al., 2023). AI literacy, as a new form of literacy, presents a novel challenge for language educators and learners. To achieve fluency as digital citizens, embracing AI literacy is poised to become an indispensable component of one's learning journey (Yang et al., 2024). Understanding and navigating the intricacies of AI literacy will be crucial in future language education.

In view of the significance of AI literacy in language education, this special issue aims to explore and address the pertinent issues surrounding its development. As such, we seek well-articulated and robust research contributions in several key areas, including but not limited to:

- Definitions, models, and frameworks of AI literacy in language education
- Theoretical/conceptual opportunities in AI literacy in language education
- Pedagogical strategies, practices, or challenges for enhancing AI literacy in or outside language classrooms
- Development of AI literacy among pre-service / in-service teachers in teacher education

- Sociocultural issues (e.g., gender, age, global citizenship) related to AI literacy in language education
- Assessment strategies for AI literacy development in language education

This special issue will be of great value to researchers, research students, and practitioners who are interested in leveraging the power of AI in language education. The papers included in this issue will be particularly valuable to language educators, enabling them to ensure effective cultivation of AI literacy in language education. Meanwhile, these studies provide valuable insights into the emerging concept of AI literacy for K-12 and higher education.

## References

Jeon, J., Lee, S., & Choe, H. (2023). Beyond ChatGPT: A conceptual framework and systematic review of speech-recognition chatbots for language learning. *Computers & Education*, 104898.

Yang, Z., Wu, J. G., & Xie, H. (2024). Taming Frankenstein's monster: Ethical considerations relating to generative artificial intelligence in education. *Asia Pacific Journal of Education*, 1-14.

## **Important dates:**

Deadline for abstract (within 500 words) submissions: August 31<sup>th</sup>, 2024

Feedback for abstracts AND Invitation for full papers: September 30<sup>th</sup>, 2024

Deadline for full paper submissions: December 30<sup>th</sup>, 2024

Publication date: Volume 2, 2025

If you are interested in contributing a research paper to address the theme of the special issue, please submit a 500-word abstract before August 31<sup>st</sup>, 2024 to [gavinjunjiewu@gmail.com](mailto:gavinjunjiewu@gmail.com).

Please note that all submissions must be original, unpublished, and not under the review of any other publication. All submitted papers will undergo a double-blind peer-review process. References should be formatted according to the Unified Style, Linguistics and Mouton reference style (see the journal homepage "Supplementary Materials" section). Interested authors should consult the journal's guidelines for manuscript submissions at:

<https://mc.manuscriptcentral.com/jccall>

All inquiries should be directed to the guest editor(s) of this special issues via [gavinjunjiewu@gmail.com](mailto:gavinjunjiewu@gmail.com).

## **About Journal of China Computer-Assisted Language Learning (JCCALL)**

Journal of China Computer-Assisted Language Learning (eISSN: 2748-3479), initiated by Beijing Foreign Studies University, is the official journal of ChinaCALL, an affiliate of China Association for Comparative Studies of English and Chinese. The journal seeks to provide an international platform for exchanging ideas, innovations and findings regarding computer-assisted language learning. Research articles and critical reviews are especially welcome in related promising fields. The journal is peer-reviewed, published in English, open-access and issued twice a year by De Gruyter and Foreign Language Teaching and Research Press.

All manuscripts should be submitted via

<https://www.degruyter.com/journal/key/jccall/html>. The potential authors need to register to commence their submissions.

All manuscript submissions will undergo a double-blind, peer review. Final decision regarding acceptance/revision/rejection will be based on the reviews received from at least two independent, anonymous expert referees.

The benefits of publishing with JCCALL involve no fees from authors, high quality peer reviewing, open access publication and rapid turnaround times. In addition, every article is easily discoverable because of SEO and comprehensive abstracting and indexing services, and secure archiving by De Gruyter and the independent archiving service Portico.
